## Review Article

# From observing to predicting single-cell structure and function with high-throughput/high-content microscopy

Anatole Chessel<sup>1</sup> and  Rafael E. Carazo Salas<sup>2</sup>

<sup>1</sup>École polytechnique, Université Paris-Saclay, 91128 Palaiseau Cedex, France; <sup>2</sup>School of Cellular & Molecular Medicine, University of Bristol, BS8 1TD Bristol, UK

**Correspondence:** Rafael E. Carazo Salas ([rafael.carazosalas@bristol.ac.uk](mailto:rafael.carazosalas@bristol.ac.uk)) and Anatole Chessel ([anatole.chessel@polytechnique.edu](mailto:anatole.chessel@polytechnique.edu))

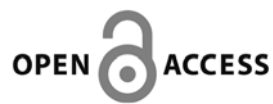

In the past 15 years, cell-based microscopy has evolved its focus from observing cell function to aiming to predict it. In particular—powered by breakthroughs in computer vision, large-scale image analysis and machine learning—high-throughput and high-content microscopy imaging have enabled to uniquely harness single-cell information to systematically discover and annotate genes and regulatory pathways, uncover systems-level interactions and causal links between cellular processes, and begin to clarify and predict causal cellular behaviour and decision making. Here we review these developments, discuss emerging trends in the field, and describe how single-cell ‘omics and single-cell microscopy are imminently in an intersecting trajectory. The marriage of these two fields will make possible an unprecedented understanding of cell and tissue behaviour and function.

## The unique role of microscopy in illuminating single cell biology

Single cell biology will fundamentally revolutionize biology and healthcare. Building on the arsenal of ‘omics technologies developed in the past 20 years—genomics, transcriptomics, metabolomics, epigenomics, proteomics, etc.—and applying them to comprehensively molecularly profile individual cells in unparalleled detail, this young field aims to: systematically elucidate what brings about cell-to-cell heterogeneity within cell populations and tissues; clarify the link between genotype and phenotype; characterize the broad diversity of existing cellular types, states, transitions and histories observed in the living; provide quantitative/predictive insights on how the pheno-genotypic landscape of cells changes upon physiological or pathological triggers; and ultimately leverage that knowledge to reveal new biology as well as help develop improved cell-based diagnostics and tools for bio/healthcare applications [1–4]. For instance the Human Cell Atlas consortium aims to exploit single-cell technologies to create the most comprehensive reference maps to date of all human cells [5]. Similarly, the use of single-cell ‘omics technologies to track embryonic development cell by cell was highlighted as part of Science Magazine’s 2018 Breakthrough of the Year [6]. Yet for all that single-cell ‘omics can give a deep molecular snapshot of cells and even their lineage relationships and history (for instance using molecular barcoding approaches [7–9]), those approaches fail to fully capture the true organization and spatiotemporal dynamics of cells and tissues as they grow, divide, die, migrate or change their structure/function through time, and hence can infer only indirectly how cells make decisions in space and in time in a cause–effect manner. This is where microscopy, particularly ‘live cell’ fluorescence light microscopy, is unchallenged and unparalleled [10–14]. This essay describes how high-throughput and high-content microscopy imaging make it possible to exploit spatial and dynamical information at the single-cell level to discover genes and pathways, observe and predict cell structure and function, and how it could shed unique light into causal cell function and evolution in ways complementary and inaccessible to other single-cell approaches.

Received: 11 March 2019  
 Revised: 24 May 2019  
 Accepted: 24 May 2019

Version of Record published:  
 26 June 2019

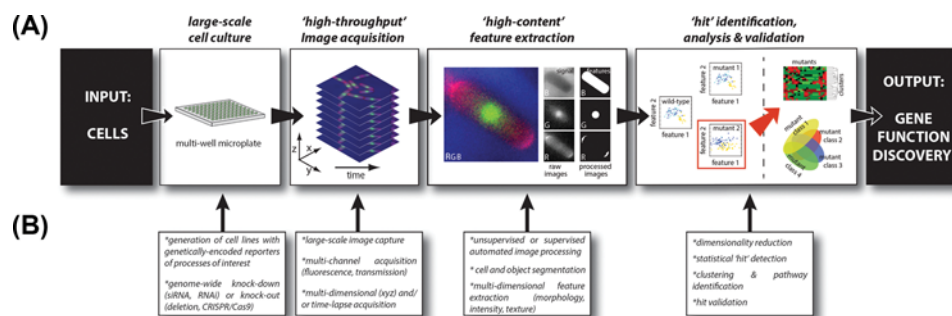

**Figure 1.** The principle of high-throughput/high-content microscopy screens to identify and study genes' functions at scale (A) Typical high-throughput/high-content microscopy pipeline, where the inputs are cells and cell images, and the output is high-dimensional, single-cell feature data. (B) Implementation steps involved in the context of a single perturbation (KD/KO) genome-wide phenotypic screen, allowing to systematically discover gene functions at scale.

## From high-throughput screening to high-throughput and high-content cell biology

The combined use of large-scale ('high-throughput'), cell-based fluorescence light microscopy with computational image analysis and feature extraction ('high-content') was originally published as a way to quantitatively profile at scale the effect of drugs on cells, in the context of pharmacological 'fixed cell' end-point assays for drug screening/development where it has been used since extensively [15–18]. However, it quickly became obvious that this could provide a new way to perform cell biological [19] experiments at scale in an unbiased, systematic and quantitative manner (Figure 1). One of the first published studies to show this was a budding yeast (*S. cerevisiae*) study using 4718 knock-out (KO) gene deletion mutant cell lines to look for genes whose mutation could yield defective cell wall, actin and nuclear DNA morphological phenotypes. That fixed-cell, endpoint assay study identified 2378 gene candidates potentially involved in controlling different aspects of cell morphology and found that similar phenotypes were caused by deletions of functionally related genes [20], providing the first illustration of the potential of this approach to do comprehensive—potentially genome-wide—reverse genetics investigations. In the 10 years that followed, and gradually empowered by the GFP revolution as well as increasingly refined techniques for systematic gene KO or knock-down (KD; RNAi/siRNA and now CRISPR), a plethora of similar studies followed using cell types ranging from yeasts to human cell lines and aiming to carry out genome-wide gene discovery and functional assignment [19,21–29]. For instance, the landmark project MitoCheck used RNA interference to KD ~21 000 human protein coding genes in live HeLa cells and systematically look for candidate human cell division genes through the genome [30]. By quantitatively and automatically analysing more than 180 000 timelapse epifluorescence microscopy movies of cells stably expressing histone H2B-GFP (>17 000 000 images), MitoCheck identified and validated 572 genes involved in cell division—over half of them never before linked to mitosis regulation – providing the largest genomic catalogue of mitotic genes until then. High-throughput microscopy phenotyping has been used with success to obtain genomic catalogues of—and discover many new genes involved in – countless basic cellular processes including cell division [30], cell migration [31], endocytosis [32,33], Golgi organization [34,35], mitochondrial quality control [36] and structure [37], the microtubule cytoskeleton [38,39] and viral infection [40]. Notably, despite all those seminal works and others, functional discovery and annotation across genomes is still very much a task in progress [41]. In the case of high-throughput microscopy screening, the reasons for this are numerous and include the fact that the translation of quantitative measurements into well-defined annotations in agreed ontologies is particularly challenging [42]. In addition microscopy-based screens have traditionally suffered from poor reproducibility [43] (i.e. a low overlap between gene lists obtained from independent screens looking at a same process) and it has been shown that the identification by microscopy-based screening of candidate genes associated with a given cell function is probabilistic and does not allow in any one screen to identify all possible genes associated with that function [39], a coverage problem that may only be gradually solved through incremental integration of complementary screens in the future.

## Using computational image analysis and machine learning for deep single-cell phenotyping

Of note, the introduction of high-content microscopy phenotyping was key to enable richer and deeper phenotypic characterization at the single-cell level, thanks to advances in numerical feature extraction, comparison and analysis [11,44–46]. Computed single-cell-based morphological, intensity and texture features can be simple and biologically interpretable, e.g. the number, size, intensity and positions of endocytic vesicles [33] or the length, number and curvature of microtubules [39], or they can be more complex mathematical constructions, like the CHARM feature set [47]. In addition, cell population-level features like cellular position and context [48,49] can be obtained. The data science pipelines needed to extract information from such descriptors is then more involved [4,50] and include comparison of conditions [51,52] and use of machine learning methods [53] (e.g. unsupervised clustering or supervised classification) to both explore cell-to-cell variability and to group cells or conditions according to phenotypic similarity for functional annotation or mechanistic characterization [54]. The publication of open source libraries and software packages performing those tasks and automating them have been fundamental to advances in the field; they are described in more detail elsewhere [45,50].

An important recent development is Deep Learning, a class of machine learning/artificial intelligence (ML/AI) algorithms that can be easier to use and far more efficient than their predecessors, and particularly adapted to images through Convolutional Neural Networks (CNNs) [55]. They have been applied to high-throughput/high-content microscopy and are sure to become a key part of analysis pipelines from now on. They can be used as a feature learning step included in a classical pipeline [56] (for example to better segment/detect cells or subcellular structures that are then analysed with more classical methods), or more thoroughly as an end-to-end trainable phenotyping strategy [57], and increasingly for fluorescent label prediction from label-free samples [58–60]. While the power and usefulness of Deep Learning approaches is clear, their downside is that they need a large amount of annotated data and computing power, and are more often of use in a supervised rather than unsupervised setting. They are also ‘black-boxes’, notoriously hard to interpret or understand with sometimes unexpected failure modes [61,62]. To mitigate those issues, on top of a good understanding of those methods special care has to be taken in evaluating the algorithms used and their results. This includes establishing standard internal controls within the algorithmic pipelines—essentially using good practices for machine learning—and, at the level of whole studies, checking for consistency of biological end results and experimentally testing predictions.

## Reconstructing regulatory networks and systems-level cellular wiring

We have so far seen how high-throughput/high-content microscopy can be used to extract rich information at the single-cell level to identify and characterise the function of genes, by using gene KD/KO strategies for example. However genes do not operate independently but as regulatory networks (interaction networks, transcription networks, metabolic or signalling networks) and uncovering those networks is a key goal of functional genomics. One common simplifying assumption to try and estimate network-level information from single condition experiments is to link conditions leading to a similar phenotype [63]. However such phenotypic similarity networks, while shown to be enriched in physical or genetic interactions and to work with some success [64], are typically noisy and hard to interpret.

## Revealing regulatory networks by double gene KD/KO

To go further and investigate the existence of a network link between two genes one has to change the experiment so that each condition probed is the combination of two interventions (Figure 2). For instance, Synthetic Genetic Array (SGA) approaches have achieved that by combinatorially crossing large collections of budding yeast KO cell lines—each knocked out for one gene in the genome—among themselves, and imaging and analysing images of the resulting colonies’ size and appearance in the plates to look for double KOs whose combinations have positive or negative (synthetic) epistatic effect on cell fitness [65,66]. The resulting ~1 million gene–gene interactions (edges) scored in this way can then be used to generate a global genetic interaction network map or ‘wiring diagram’ of a typical *S. cerevisiae* cell. Similar approaches have been applied to mammalian cells using finer epifluorescence microscopy-based readouts [67–69]. Building on those methods, the combination of high-content microscopy phenotyping with double KO/KD interventions allows looking for more complex epistatic relationships between genes, either by considering each single phenotype independently under a multiplicative assumption [70,71] or by combining them to infer directed interaction networks [67]. Monitoring how the synthetic double KO/KD phenotypes

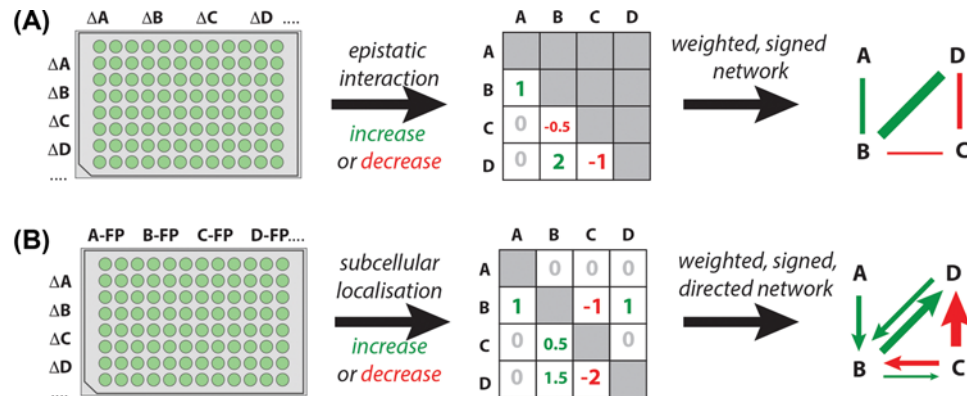

**Figure 2. Reconstructing gene/protein networks and systems-level interactions between cellular processes**

Using two interventions, either by double gene KD/KO (A) or by combining gene KD/KO with fluorescent protein (FP) tagging (B), allows the reconstruction of functional interactions between genes/proteins and construction of regulatory networks.

change over time allows mapping how regulatory networks rewire, giving a much more complex picture of regulatory network dynamics [72].

## Revealing regulatory networks by combining gene KD/KO and protein localization

Another way to combinatorially probe and reveal edges in regulatory networks is by combining the use of gene KD/KO strategies with fluorescently tagged protein (re)localization, to build a so-called Localisation Interdependency Network (LIN) [73]. According to this approach, if the protein produced by gene B becomes de-localized in cells as a function of KD/KO of gene A, then the localization (and function) of B depends on A, thereby directly revealing a directed edge going from gene/protein A to gene/protein B. When done combinatorially across many genes by high-throughput epifluorescence microscopy imaging this procedure allows the generation of a signed, directed and weighted network connecting those genes without need for directionality inference – thereby overcoming an intrinsic limitation of double gene KD/KO approaches. Technical challenges with the LIN approach include the fact that fluorescently tagging proteins using genetically encoded fluorescent tags (like GFP) often compromises their function, hence careful quality control and validation is required, as well as challenges with quantifying intracellular protein localisation changes and phenotypes. This technique was used with success to investigate interactions between the core ~40 cell polarity regulators of fission yeast (*S. pombe*), revealing the most complete picture of the cell polarity network for that cell type to date and discovering 554 pairwise interactions among the polarity regulators (98% of them novel) as well as ‘modular’ interactions between subgroups of regulators in the network. A similar much larger scale approach was used in *S. cerevisiae* combining SGA and high-throughput/high-content microscopy phenotyping to identify how the entire budding yeast proteome changes over time in response to drugs like rapamycin and hydroxyurea [74]. These approaches, as well as emerging perturbation-free approaches exploiting inherent cellular fluctuations in fluorescently labelled proteins [75,76], are enabling to map information flow in regulatory networks at unprecedented spatial and temporal resolution.

## Inferring systems-level interactions and causal links between cellular processes

Another means of deriving biologically meaningful networks from multivariate single-cell data is using Bayesian network inference through a Bayesian graphical model of the probability distribution of the measurements. By computing conditional independencies Bayesian network inference allows the investigation of possible causality relationships between variables. This approach was proposed early on for use in flow cytometry [77], where single cell fluorescence measurements of phosphoproteins can be linked to activity and a signalling network can be inferred. In high-content screening, it was introduced to look at causality relationships between cellular/subcellular features, to allow building a high level system-wide description of the processes under study. Using Bayesian network inference the projects HepatoSys and Endotrack were able for example to identify and predict key differences in the design principles of the endocytosis of Transferrin versus that of Epidermal Growth Factor in human cell lines [33]. Similarly in



the ‘multi-process’ phenomics project SYSGRO, which monitored how fission yeast cell shape, microtubule organization and cell cycle progression co-vary simultaneously across a genome-wide collection of mutant cell lines, Bayesian network inference was used to predict directional systems-level functional links between cell shape and microtubule control that could be successfully experimentally validated [39]. It is important to point out that although potentially very powerful such network inference methods are not infallible and the computational predictions derived from them (the topology and directionality of the network) must be experimentally validated, a step unfortunately too often missing in such studies. In the future methods taking full advantage of high-dimensional, multi-process, multi-parametric single-cell information measured jointly in a cell/cell population [78,79] promise to increasingly provide a goldmine of discovery into how cells work as integrated systems.

## Pushing the limits of single-cell high-content imaging: multi-scale, dynamical, functional

High-throughput/high-content microscopy is naturally evolving, as is microscopy as a whole, away from purely cell-level assays and questions towards the two nearest scales, tissues and organs above and single molecules below. In both cases technical obstacles abound but recent works are promising. At the larger scale, beyond the more classical methods extending the study of organoids at higher throughput [80], methods based on microfluidics for the generation of microencapsulated organoids on matrigel beads have been proposed [81]. At the smaller scale, an automated workflow for single-molecule localization microscopy on 96-well plates has been proposed [82], with the main issues being optimising acquisition, processing, analysis and storage to manage the data deluge that those methods generate. Equivalent techniques have also been used to study the nanoscale organization of bacterial cell division [83].

Another important milestone has been achieved by moving high-throughput/high-content microscopy into the realm of measuring 3D protein dynamics in live cells, at scale. Building on its predecessor MitoCheck, the follow on MitoSys project recently used Fluorescence Correlation Spectroscopy (FCS) to build the most resolved ‘mitotic cell atlas’ of the dynamics and potential interaction in 4D (3D + time) of proteins controlling cell division [84]. Focusing on 28 mitotic proteins tagged with eGFP and using supervised machine learning, the authors were furthermore able to assign protein quantities to six organelles (chromosomes, nuclear envelope, kinetochores, spindle, centrosomes and midbody) and determine the timing, stoichiometry and dissociation rates in those organelles for multiple mitotic proteins, demonstrating for example that AURKB kinase and its regulator CDCA8/borealin only partially colocalize at the midbody and that AURKB exhibits most likely an additional localization at the contractile cytokinetic ring consistent with a known cytokinetic function for that kinase. This provides a template for the elucidation of dynamical protein atlases in cells.

Finally, an area where the limits of high-content imaging are also being pushed is the integration of single-cell ‘omics with imaging, enabled by techniques such as mass spectrometry imaging (MSI) combined with microscopy [85–87] and *in situ* single-cell RNA profiling [88–92]. In the future these approaches are bound to give new and substantial functional depth to the microscopic study of single cell biology.

## Sharing and integrating large microscopy phenomics datasets to boost discovery

One characteristic of high-content studies – particularly single-cell based – is the size and complexity of the data and metadata generated, from raw images to segmented single cells to the numerical features computed from those cells and the annotation eventually associated to them. Trying to organise that complexity has been the focus of much work in the community, from the identification of specific/suitable file formats [93,94], to the generation of databases [95,96] across modalities [97] and of interactive data visualisation tools [98]. Not surprisingly, given the size and very high cost of large high-throughput/high-content microscopy projects, initiatives to promote data sharing for re-use and cross analysis are becoming more common [99]. An example worth noting is the Image Data Resource (IDR, <https://idr.openmicroscopy.org>), the largest community-driven microscopy phenomics dataset resource in the world, which aims to bring together, organise and share with the community reference large-scale microscopy phenomics datasets (original image data, image-derived feature data, annotations and metadata) generated the world over using multiple imaging modalities in common ontologies and databases, so that the community is able to continue the discovery process by mining and integrating the datasets among themselves and with other existing pheno-genomic resources (STRING, GO, etc.) and to promote integration across organisms, biological processes and scales [100]. Although many of the >40 studies currently contained in IDR did not include single-cell data when originally published (particularly the older high-throughput microscopy datasets), an increasing number of the novel studies does.

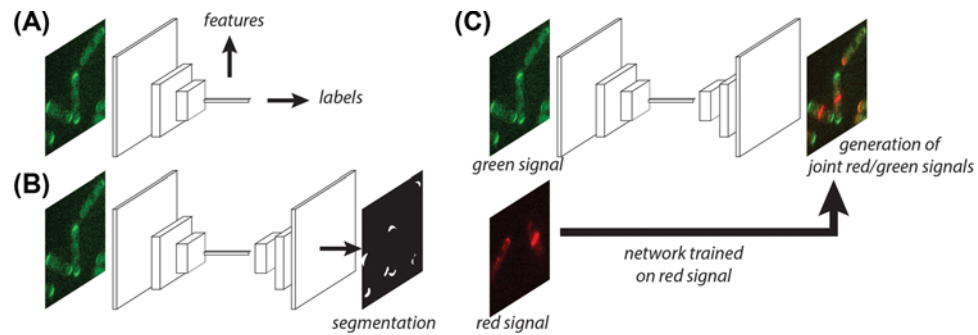

**Figure 3. Predicting spatio-temporal cellular structure using Deep Learning**

The three main current uses of Deep Learning are: (A) phenotypically labelled images of whole image fields or single cells are used to learn a classification and/or a set of features for future uses; (B) pixel-level segmentation masks are used to train pixel-to-pixel networks for automated classification; (C) generative networks are given pairs of multi-channel images and trained to generate one channel given the others.

Likewise, many IDR image data sets can be reanalysed at the single-cell level even though the original publications describing them did not. In the future, by enabling the re-analysis and integration of an increasing number of datasets this unique resource promises to provide a precious trove of microscopy phenomics data for single-cell exploration and to help catalyze future biological discovery.

## Exploiting single-cell data to predict cell structure-dynamics with artificial intelligence

An important avenue of research brought back to the forefront by recent work is generative models. Generative models aim to generate (i.e. simulate) new typical examples of the data under study to investigate statistical variability, allow a more accurate and intuitive way to describe a particular localisation or enable better and more realistic cellular models [101]. For instance in an earlier study the authors were able to learn conditional generative models of punctuate patterns knowing microtubule localisation, enabling the study of relative positions of organelles with single-cell resolution [102]. Strikingly, very recent work shows that Deep Neural Networks, on top of their use in discrimination and classification seen in earlier Deep Learning applications, can also be fantastic tools as generative models [103] (Figure 3). For example, so-called Generative Adversarial Networks (GANs) have been proposed by several groups as a means to do ‘impossible experiments’, i.e. to complete the data that is available with data that cannot be obtained but can be ‘guessed’ (i.e. predicted) [104,105]. Other uses of GANs include generating data to help in the training of data hungry Deep Neural Networks [106,107] or uses in correlative microscopy by learning an imaging modality from another (for example to generate super-resolution microscopy images from wide-field microscopy images [108] or predict labels from label-free images). We anticipate that in the future GANs and related methods will provide an invaluable tool to allow the enrichment of available datasets with computationally generated but biologically meaningful additions (including e.g. by data augmentation [109,110]) and will enable previously inaccessible studies. Importantly, going forward and as with Deep Learning in general, thorough, unbiased and study-specific evaluation and controls will be crucial to ensure trust and reproducibility. This might become particularly important in the future to prevent and avoid abuse of such powerful methods to generate synthetic ‘fake data’ [111], a recognized threat in the realms of social media, public discourse and politics that has not been contemplated until now in the scientific arena and might gravely corrupt scientific publications and databases if neglected.

## Towards predicting causal cell behaviour and decision making

Lastly, an area where single-cell microscopy phenomics can give unique insights into cell function is clarifying cellular decision-making and how the behaviour of a heterogeneous population of cells evolves through time, such that some cells take one fate and other cells another. While single-cell ‘omics information can enable the inference of some aspects of cell lineage relationships and history, the information is ‘time implicit’ (i.e. the true timing and duration of events monitored are not known) and space agnostic. How cells grow, divide, die or migrate [112,113] or change their structure/function/location/fate through time within a population or tissue, the cell-to-cell temporal noise in

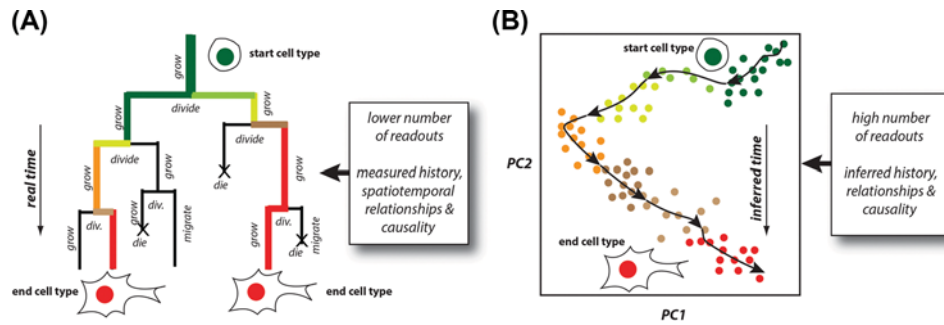

**Figure 4. Measuring and predicting causal cell behaviour by time-resolved, continuous single-cell microscopy**

(A) Single-cell microscopy (represented by a multi-generation cell lineage) allows tracking in real time spatiotemporal cell decisions – e.g. how cells grow, divide, die, migrate or change their structure, function, location and fate within a population – and the cell-to-cell heterogeneity of those decisions in ways inaccessible and complementary to (B) single-cell ‘omics (represented by a pseudo-time ordered PCA plot of ‘omics data from a cell population; each cell is 1 dot). As explained in the text this is epitomised by the time and location of cell death events (marked with an ‘X’ in (A)), which though crucial to cell population and tissue evolution are invisible to single-cell ‘omics approaches but visible by single-cell microscopy.

those single-cell decisions, the true timing and time scale of those decisions on a cell-by-cell basis, and how all of this impacts on how each cell and the heterogeneous cell population and its progeny as a whole evolve [114] are dynamical informations simply inaccessible to single-cell ‘omics approaches [24,115]. The time and location of cell death events in a tissue clearly exemplify this blind spot of ‘omics single-cell approaches: those informations though crucial for cell and tissue patterning and homeostasis [116,117] just cannot be derived from inferred cell lineages; only real time measurement of those events could inform about them. Time-resolved multi-process microscopy phenotyping and cellular lineaging hence plays a unique and powerful role in making available such dynamical informations [118,119], and as such (although currently not yet very common) will continue to play an indispensable role in allowing to accurately measure and – powered by predictive analytics approaches from e.g. ML/AI – to precisely predict causally the behaviour, function and fate [120] of single-cells, cell populations and tissues (Figure 4). For example continuous multi-generational, time-lapse multi-colour single-cell tracking and lineaging by epifluorescence microscopy of mouse Embryonic Stem Cells (mESCs) expressing the fluorescently labelled pluripotency transcription factor NanogVENUS combined with exact Bayesian inference revealed that in mESCs Nanog autoregulates by weak negative feedback [121], and Deep Neural Networks were able—using brightfield-derived information—to predict mouse hematopoietic stem and progenitor cell (HSPC) lineage choice during differentiation up to three generations before it could be detected by immuno-fluorescence using conventional markers [122]. These examples illustrate the enormous future potential of combining large amounts of biological information (‘biological Big Data’) derived from continuous time-resolved microscopy with predictive analytics not just for the discovery of basic biological mechanisms but also for improving technologies for tissue bioengineering as well as to enable highly precise and predictive diagnostics of clinical samples [123].

## Conclusions

Since its birth 15 years ago high-throughput/high-content microscopy has enabled the systematic identification of genes, pathways and cell biological mechanisms by exploiting single-cell derived rich structural as well as dynamical information about cells, their context and their evolution within cell populations. The recent marriage of single-cell microscopy phenotyping with predictive data analytics powered by ML/AI is dramatically shifting the focus from observing and exploiting cell behaviour to learning how to accurately predict it, with promising basic and biomedical applications. In many ways, single-cell microscopy phenotyping remains for the most part an orthogonal source of biological Big Data separate from ‘omics derived single-cell data, with different tradeoff between spatiotemporal resolution and the amount of readouts being followed. We foresee that in the future substantial effort will be invested in producing a similar marriage between ‘omics single-cell data strategies and high-throughput/high-content microscopy phenomics—currently sparse and mostly challenging [124–126]—and that this will bring about a fundamental step change in our capacity to predict and potentially control cell function. With microscopy the future is bright.

## Summary

- In the past 15 years, single-cell based microscopy has evolved its focus from observing cell function to aiming to predict it.
- This has been possible thanks to breakthroughs in computer vision, large-scale image analysis and machine learning.
- In this way high-throughput/high-content microscopy has enabled to discover and annotate genes, pathways and links between processes, and to begin clarifying cell decision making.
- In the future, the marriage of single-cell ‘omics and single-cell microscopy will make possible an unprecedented understanding of cell and tissue behaviour and function.

## Competing Interests

The authors declare that there are no competing interests associated with the manuscript.

## Abbreviations

GAN, Generative Adversarial Network; IDR, Image Data Resource; KD, knock-down; KO, knock-out; LIN, Localisation Interdependency Network; mESC, mouse Embryonic Stem Cell; ML/AI, machine learning/artificial intelligence; SGA, Synthetic Genetic Array.

## References

- (2017) Single-cell biology. *Nature*, <https://www.nature.com/collections/gbljnzchgg>
- Haselgrübler, T. et al. (2014) High-throughput, multiparameter analysis of single cells. *Anal. Bioanal. Chem.* **406**, 3279–3296, <https://doi.org/10.1007/s00216-013-7485-x>
- Perkel, J.M. (2015) Single-cell biology: the power of one. *Science* **350**, 696–698, <https://doi.org/10.1126/science.350.6261.696>
- Yuan, G.C. et al. (2017) Challenges and emerging directions in single-cell analysis. *Genome Biol.* **18**, 84, <https://doi.org/10.1186/s13059-017-1218-y>
- Human Cell Atlas. <https://www.humancellatlas.org/>
- (2018) Breakthrough of the Year 2018. <http://vis.sciencemag.org/breakthrough2018/>
- Alemaný, A., Florescu, M., Baron, C.S., Peterson-Maduro, J. and van Oudenaarden, A (2018) Whole-organism clone tracing using single-cell sequencing. *Nature* **556**, 108, <https://www.nature.com/articles/nature25969-supplementary-information>, <https://doi.org/10.1038/nature25969>
- McKenna, A. et al. (2016) Whole-organism lineage tracing by combinatorial and cumulative genome editing. *Science* **353**, aaf7907, <https://doi.org/10.1126/science.aaf7907>
- Wagner, D.E. et al. (2018) Single-cell mapping of gene expression landscapes and lineage in the zebrafish embryo. *Science* **360**, 981–987, <https://doi.org/10.1126/science.aar4362>
- Sandmann, T. and Boutros, M. (2012) Screens, maps & networks: from genome sequences to personalized medicine. *Curr. Opin. Genet. Development* **22**, 36–44
- Roukos, V. and Misteli, T. (2014) Deep imaging: the next frontier in microscopy. *Histochem. Cell Biol.* **142**, 125–131, <https://doi.org/10.1007/s00418-014-1239-5>
- Horwitz, R. (2016) Integrated, multi-scale, spatial-temporal cell biology – a next step in the post genomic era. *Methods* **96**, 3–5, <https://doi.org/10.1016/j.ymeth.2015.09.007>
- Skylaki, S., Hilsenbeck, O. and Schroeder, T. (2016) Challenges in long-term imaging and quantification of single-cell dynamics. *Nat. Biotechnol.* **34**, 1137, <https://doi.org/10.1038/nbt.3713>
- Del Sol, A., Thiesen, H.J., Imitola, J. and Carazo Salas, R.E. (2017) Big-data-driven stem cell science and tissue engineering: vision and unique opportunities. *Cell Stem Cell* **20**, 157–160, <https://doi.org/10.1016/j.stem.2017.01.006>
- Korn, K. and Krausz, E. (2007) Cell-based high-content screening of small-molecule libraries. *Curr. Opin. Chem. Biol.* **11**, 503–510, <https://doi.org/10.1016/j.cbpa.2007.08.030>
- Lang, P., Yeow, K., Nichols, A. and Scheer, A. (2006) Cellular imaging in drug discovery. *Nat. Rev. Drug Discov.* **5**, 343, <https://doi.org/10.1038/nrd2008>
- Perlman, Z.E. et al. (2004) Multidimensional drug profiling by automated microscopy. *Science* **306**, 1194–1198, <https://doi.org/10.1126/science.1100709>
- Rausch, O (2006) High content cellular screening. *Curr. Opin. Chem. Biol.* **10**, 316–320, <https://doi.org/10.1016/j.cbpa.2006.06.004>
- Mattiazzi Usaj, M. et al. (2016) High-content screening for quantitative cell biology. *Trends Cell Biol.* **26**, 598–611, <https://doi.org/10.1016/j.tcb.2016.03.008>



- 20 Ohya, Y. et al. (2005) High-dimensional and large-scale phenotyping of yeast mutants. *PNAS* **102**, 19015–19020, <https://doi.org/10.1073/pnas.0509436102>
- 21 Erfle, H., Simpson, J.C., Bastiaens, P.I.H. and Pepperkok, R. (2004) siRNA cell arrays for high-content screening microscopy. *BioTechniques* **37**, 454–462, <https://doi.org/10.2144/04373RT01>
- 22 Pepperkok, R. and Ellenberg, J. (2006) High-throughput fluorescence microscopy for systems biology. *Nat. Rev. Mol. Cell Biol.* **7**, 690, <https://doi.org/10.1038/nrm1979>
- 23 Wollman, R. and Stuurman, N (2007) High throughput microscopy: from raw images to discoveries. *J. Cell Sci.* **120**, 3715–3722, <https://doi.org/10.1242/jcs.013623>
- 24 Muzzey, D. and Oudenaarden, A.V. (2009) Quantitative time-lapse fluorescence microscopy in single cells. *Annu. Rev. Cell Dev. Biol.* **25**, 301–327, <https://doi.org/10.1146/annurev.cellbio.042308.113408>
- 25 Conrad, C. and Gerlich, D.W. (2010) Automated microscopy for high-content RNAi screening. *J. Cell Biol.* **188**, 453–461, <https://doi.org/10.1083/jcb.200910105>
- 26 Boutros, M., Heigwer, F. and Laufer, C. (2015) Microscopy-based high-content screening. *Cell* **163**, 1314–1325, <https://doi.org/10.1016/j.cell.2015.11.007>
- 27 Ohya, Y., Kimori, Y., Okada, H. and Ohnuki, S. (2015) Single-cell phenomics in budding yeast. *Mol. Biol. Cell* **26**, 3920–3925, <https://doi.org/10.1091/mbc.E15-07-0466>
- 28 Moreau, D. and Gruenberg, J. (2016) Automated microscopy and high content screens (phenotypic screens) in academia labs. *CHIMIA Int. J. Chem.* **70**, 878–882, <https://doi.org/10.2533/chimia.2016.878>
- 29 Rallis, C. and Bähler, J. (2016) Cell-based screens and phenomics with fission yeast. *Crit. Rev. Biochem. Mol. Biol.* **51**, 86–95, <https://doi.org/10.3109/10409238.2015.1103205>
- 30 Neumann, B., Walter, T., Hériché, J.-K., Bulkescher, J., Erfle, H., Conrad, C. et al. (2010) Phenotypic profiling of the human genome by time-lapse microscopy reveals cell division genes. *Nature* **464**, 721, <https://doi.org/10.1038/nature08869>
- 31 Williams, S.P. et al. (2017) Systematic high-content genome-wide RNAi screens of endothelial cell migration and morphology. *Scientific Data* **4**, 170009, <https://www.nature.com/articles/sdata20179-supplementary-information>, <https://doi.org/10.1038/sdata.2017.9>
- 32 Pelkmans, L. et al. (2005) Genome-wide analysis of human kinases in clathrin- and caveolae/raft-mediated endocytosis. *Nature* **436**, 78, <https://www.nature.com/articles/nature03571-supplementary-information>, <https://doi.org/10.1038/nature03571>
- 33 Collinet, C. et al. (2010) Systems survey of endocytosis by multiparametric image analysis. *Nature* **464**, 243, <https://www.nature.com/articles/nature08779-supplementary-information>, <https://doi.org/10.1038/nature08779>
- 34 Chia, J. et al. (2013) RNAi screening reveals a large signaling network controlling the Golgi apparatus in human cells. *Mol. Syst. Biol.* **9**, 677, <https://doi.org/10.1038/msb.2013.34>
- 35 Galea, G. and Simpson, J.C. (2013) *Methods in Cell Biology* (Perez, Franck and Stephens, David J., eds), vol. **vol. 118**, pp. 281–295, Academic Press
- 36 Hasson, S.A. et al. (2013) High-content genome-wide RNAi screens identify regulators of parkin upstream of mitophagy. *Nature* **504**, 291, <https://www.nature.com/articles/nature12748-supplementary-information>, <https://doi.org/10.1038/nature12748>
- 37 Tavassoli, S., Chao, J.T. and Loewen, C. (2009) A high-throughput method to globally study the organelle morphology in *S. cerevisiae*. *J. Vis. Exp* **25**, e1224, <https://doi.org/10.3791/1224>
- 38 Vizeacoumar, F.J. et al. (2010) Integrating high-throughput genetic interaction mapping and high-content screening to explore yeast spindle morphogenesis. *J. Cell Biol.* **188**, 69–81, <https://doi.org/10.1083/jcb.200909013>
- 39 Graml, V. et al. (2014) A genomic multiprocess survey of machineries that control and link cell shape, microtubule organization, and cell-cycle progression. *Dev. Cell* **31**, 227–239, <https://doi.org/10.1016/j.devcel.2014.09.005>
- 40 Mercer, J. et al. (2012) RNAi screening reveals proteasome- and Cullin3-dependent stages in vaccinia virus infection. *Cell Reports* **2**, 1036–1047, <https://doi.org/10.1016/j.celrep.2012.09.003>
- 41 Wood, V. et al. (2019) Hidden in plain sight: what remains to be discovered in the eukaryotic proteome? *Open Biol.* **9**, 180241, <https://doi.org/10.1098/rsob.180241>
- 42 Serrano-Solano, B., Díaz Ramos, A., Hériché, J.-K. and Ranea, J.A.G. (2017) How can functional annotations be derived from profiles of phenotypic annotations? *BMC Bioinformatics* **18**, 96, <https://doi.org/10.1186/s12859-017-1503-5>
- 43 Barr, A.R. and Bakal, C. (2012) A direct look at RNAi screens. *Mol. Syst. Biol.* **8**, 580, <https://doi.org/10.1038/msb.2012.14>
- 44 Sommer, C. and Gerlich, D.W. (2013) Machine learning in cell biology – teaching computers to recognize phenotypes. *J. Cell Sci.* **126**, 5529–5539, <https://doi.org/10.1242/jcs.123604>
- 45 Chessel, A. (2017) An overview of data science uses in bioimage informatics. *Methods* **115**, 110–118, <https://doi.org/10.1016/j.ymeth.2016.12.014>
- 46 Smith, K. et al. (2018) Phenotypic image analysis software tools for exploring and understanding big image data from cell-based assays. *Cell Syst.* **6**, 636–653, <https://doi.org/10.1016/j.cels.2018.06.001>
- 47 Orlov, N. et al. (2008) WND-CHARM: multi-purpose image classification using compound image transforms. *Pattern Recognit. Lett.* **29**, 1684–1693, <https://doi.org/10.1016/j.patrec.2008.04.013>
- 48 Snijder, B. et al. (2009) Population context determines cell-to-cell variability in endocytosis and virus infection. *Nature* **461**, 520, <https://www.nature.com/articles/nature08282-supplementary-information>, <https://doi.org/10.1038/nature08282>
- 49 Snijder, B. et al. (2012) Single-cell analysis of population context advances RNAi screening at multiple levels. *Mol. Syst. Biol.* **8**, 579, <https://doi.org/10.1038/msb.2012.9>
- 50 Caicedo, J.C. et al. (2017) Data-analysis strategies for image-based cell profiling. *Nat. Methods* **14**, 849, <https://doi.org/10.1038/nmeth.4397>

- 51 Pauwels, E. et al. (2012) A probabilistic model for cell population phenotyping using HCS data. *PLoS One* **7**, e42715, <https://doi.org/10.1371/journal.pone.0042715>
- 52 Sommer, C., Hoefler, R., Samwer, M. and Gerlich, D.W. (2017) A deep learning and novelty detection framework for rapid phenotyping in high-content screening. *Mol. Biol. Cell* **28**, 3428–3436, <https://doi.org/10.1091/mbc.e17-05-0333>
- 53 Scheeder, C., Heigwer, F. and Boutros, M. (2018) Machine learning and image-based profiling in drug discovery. *Curr. Opin. Syst. Biol.* **10**, 43–52, <https://doi.org/10.1016/j.coisb.2018.05.004>
- 54 Caicedo, J.C., Singh, S. and Carpenter, A.E. (2016) Applications in image-based profiling of perturbations. *Curr. Opin. Biotechnol.* **39**, 134–142, <https://doi.org/10.1016/j.copbio.2016.04.003>
- 55 LeCun, Y., Bengio, Y. and Hinton, G. (2015) Deep learning. *Nature* **521**, 436, <https://doi.org/10.1038/nature14539>
- 56 Dürr, O. and Sick, B. (2016) Single-cell phenotype classification using deep convolutional neural networks. *J. Biomol. Screen* **21**, 998–1003, <https://doi.org/10.1177/1087057116631284>
- 57 Kraus, O.Z. et al. (2017) Automated analysis of high-content microscopy data with deep learning. *Mol. Syst. Biol.* **13**, 924, <https://doi.org/10.15252/msb.20177551>
- 58 Brent, R. and Boucheron, L. (2018) Deep learning to predict microscope images. *Nat. Methods* **15**, 868–870, <https://doi.org/10.1038/s41592-018-0194-9>
- 59 Christiansen, E.M. et al. (2018) *In silico* labeling: predicting fluorescent labels in unlabeled images. *Cell* **173**, 792.e719–803.e719, <https://doi.org/10.1016/j.cell.2018.03.040>
- 60 Ounkomol, C., Seshamani, S., Maleckar, M.M., Collman, F. and Johnson, G.R. (2018) Label-free prediction of three-dimensional fluorescence images from transmitted-light microscopy. *Nat. Methods* **15**, 917–920, <https://doi.org/10.1038/s41592-018-0111-2>
- 61 Nguyen, A., Yosinski, J. and Clune, J. (2015) Deep neural networks are easily fooled: high confidence predictions for unrecognizable images. *arXiv:1412.1897*
- 62 Su, J., Vasconcellos Vargas, D. and Kouichi, S. (2017) One pixel attack for fooling deep neural networks. *arXiv:1710.08864*
- 63 Markowetz, F. (2010) How to understand the cell by breaking it: network analysis of gene perturbation screens. *PLoS Comput. Biol.* **6**, e1000655, <https://doi.org/10.1371/journal.pcbi.1000655>
- 64 Bakal, C., Aach, J., Church, G. and Perrimon, N. (2007) Quantitative morphological signatures define local signaling networks regulating cell morphology. *Science* **316**, 1753–1756, <https://doi.org/10.1126/science.1140324>
- 65 Costanzo, M. et al. (2016) A global genetic interaction network maps a wiring diagram of cellular function. *Science* **353**, aaf1420, <https://doi.org/10.1126/science.aaf1420>
- 66 Usaj, M. et al. (2017) TheCellMap.org: a web-accessible database for visualizing and mining the global yeast genetic interaction network. *G3: Genes|Genomes|Genetics* **7**, 1539–1549, <https://doi.org/10.1534/g3.117.040220>
- 67 Laufer, C., Fischer, B., Billmann, M., Huber, W. and Boutros, M. (2013) Mapping genetic interactions in human cancer cells with RNAi and multiparametric phenotyping. *Nat. Methods* **10**, 427, <https://www.nature.com/articles/nmeth.2436-supplementary-information>, <https://doi.org/10.1038/nmeth.2436>
- 68 Roguev, A. et al. (2013) Quantitative genetic-interaction mapping in mammalian cells. *Nat. Methods* **10**, 432, <https://www.nature.com/articles/nmeth.2398-supplementary-information>, <https://doi.org/10.1038/nmeth.2398>
- 69 Billmann, M. and Boutros, M. (2017) Systematic epistatic mapping of cellular processes. *Cell Division* **12**, 2, <https://doi.org/10.1186/s13008-016-0028-z>
- 70 Horn, T. et al. (2011) Mapping of signaling networks through synthetic genetic interaction analysis by RNAi. *Nat. Methods* **8**, 341, <https://www.nature.com/articles/nmeth.1581-supplementary-information>, <https://doi.org/10.1038/nmeth.1581>
- 71 Fischer, B. et al. (2015) A map of directional genetic interactions in a metazoan cell. *eLife* **4**, e05464, <https://doi.org/10.7554/eLife.05464>
- 72 Heigwer, F. et al. (2018) Time-resolved mapping of genetic interactions to model rewiring of signaling pathways. *eLife* **7**, e40174, <https://doi.org/10.7554/eLife.40174>
- 73 Dodgson, J., Chessell, A., Vaggi, F., Giordan, M., Yamamoto, M., Arai, K. et al. (2017) Reconstructing regulatory pathways by systematically mapping protein localization interdependency networks. *bioRxiv* 116749, <https://doi.org/10.1101/116749>
- 74 Chong, Y.T. et al. (2015) Yeast proteome dynamics from single cell imaging and automated analysis. *Cell* **161**, 1413–1424, <https://doi.org/10.1016/j.cell.2015.04.051>
- 75 Machacek, M. et al. (2009) Coordination of Rho GTPase activities during cell protrusion. *Nature* **461**, 99, <https://www.nature.com/articles/nature08242-supplementary-information>, <https://doi.org/10.1038/nature08242>
- 76 Isogai, T. and Danuser, G. (2018) Discovery of functional interactions among actin regulators by analysis of image fluctuations in an unperturbed motile cell system. *Phil. Trans. R. Soc. B* **373**, 20170110, <https://doi.org/10.1098/rstb.2017.0110>
- 77 Sachs, K., Perez, O., Pe'er, D., Lauffenburger, D.A. and Nolan, G.P. (2005) Causal protein-signaling networks derived from multiparameter single-cell data. *Science* **308**, 523–529, <https://doi.org/10.1126/science.1105809>
- 78 Gut, G., Herrmann, M.D. and Pelkmans, L. (2018) Multiplexed protein maps link subcellular organization to cellular states. *Science* **361**, eaar7042, <https://doi.org/10.1126/science.aar7042>
- 79 Valm, A.M. et al. (2017) Applying systems-level spectral imaging and analysis to reveal the organelle interactome. *Nature* **546**, 162, <https://www.nature.com/articles/nature22369-supplementary-information>, <https://doi.org/10.1038/nature22369>
- 80 Li, L. and LaBarbera, D.V. (2017) 3D High-content screening of organoids for drug discovery. In *Comprehensive medicinal chemistry III* (Chackalamanni, S., Rotella, D. and Ward, S., eds), Elsevier, Amsterdam, The Netherlands
- 81 Laperrousaz, B. et al. (2018) Direct transfection of clonal organoids in Matrigel microbeads: a promising approach toward organoid-based genetic screens. *Nucleic Acids Res.* **46**, e70–e70, <https://doi.org/10.1093/nar/gky030>

- 82 Beghin, A. et al. (2017) Localization-based super-resolution imaging meets high-content screening. *Nat. Methods* **14**, 1184, <https://www.nature.com/articles/nmeth.4486-supplementary-information>, <https://doi.org/10.1038/nmeth.4486>
- 83 Holden, S.J. et al. (2014) High throughput 3D super-resolution microscopy reveals *Caulobacter crescentus* in vivo Z-ring organization. *Proc. Natl. Acad. Sci.* **111**, 4566–4571, <https://doi.org/10.1073/pnas.1313368111>
- 84 Cai, Y. et al. (2018) Experimental and computational framework for a dynamic protein atlas of human cell division. *Nature* **561**, 411–415, <https://doi.org/10.1038/s41586-018-0518-z>
- 85 Buchberger, A.R., DeLaney, K., Johnson, J. and Li, L. (2018) Mass spectrometry imaging: a review of emerging advancements and future insights. *Anal. Chem.* **90**, 240–265, <https://doi.org/10.1021/acs.analchem.7b04733>
- 86 Dong, Y., Li, B. and Aharoni, A. (2016) More than pictures: when MS imaging meets histology. *Trends Plant Sci.* **21**, 686–698, <https://doi.org/10.1016/j.tplants.2016.04.007>
- 87 Miura, D., Fujimura, Y. and Wariishi, H. (2012) In situ metabolomic mass spectrometry imaging: recent advances and difficulties. *J. Proteomics* **75**, 5052–5060, <https://doi.org/10.1016/j.jprot.2012.02.011>
- 88 Eng, C.-H.L. et al. (2019) Transcriptome-scale super-resolved imaging in tissues by RNA seqFISH+. *Nature* **568**, 235–239, <https://doi.org/10.1038/s41586-019-1049-y>
- 89 Ke, R. et al. (2013) In situ sequencing for RNA analysis in preserved tissue and cells. *Nat. Methods* **10**, 857, <https://www.nature.com/articles/nmeth.2563-supplementary-information>, <https://doi.org/10.1038/nmeth.2563>
- 90 Lee, J.H. et al. (2014) Highly multiplexed subcellular RNA sequencing in situ. *Science* **343**, 1360–1363, <https://doi.org/10.1126/science.1250212>
- 91 Lubeck, E., Coskun, A.F., Zhiyentayev, T., Ahmad, M. and Cai, L. (2014) Single-cell in situ RNA profiling by sequential hybridization. *Nat. Methods* **11**, 360, <https://www.nature.com/articles/nmeth.2892-supplementary-information>, <https://doi.org/10.1038/nmeth.2892>
- 92 Strell, C. et al. (2019) Placing RNA in context and space – methods for spatially resolved transcriptomics. *FEBS J.* **286**, 1468–1481, <https://doi.org/10.1111/febs.14435>
- 93 GitHub – CellH5/cellh5. <https://github.com/CellH5/cellh5>
- 94 Millard, B.L., Niepel, M., Menden, M.P., Muhlich, J.L. and Sorger, P.K. (2011) Adaptive informatics for multifactorial and high-content biological data. *Nat. Methods* **8**, 487, <https://www.nature.com/articles/nmeth.1600-supplementary-information>, <https://doi.org/10.1038/nmeth.1600>
- 95 Allan, C. et al. (2012) Omero: flexible, model-driven data management for experimental biology. *Nat. Methods* **9**, 245, <https://www.nature.com/articles/nmeth.1896-supplementary-information>, <https://doi.org/10.1038/nmeth.1896>
- 96 Marée, R. et al. (2016) Collaborative analysis of multi-gigapixel imaging data using cytomine. *Bioinformatics* **32**, 1395–1401, <https://doi.org/10.1093/bioinformatics/btw013>
- 97 Carr, A. et al. (2012) InterMine: a flexible data warehouse system for the integration and analysis of heterogeneous biological data. *Bioinformatics* **28**, 3163–3165, <https://doi.org/10.1093/bioinformatics/bts577>
- 98 Antal, B., Chessel, A. and Carazo Salas, R.E. (2015) Mineotaur: a tool for high-content microscopy screen sharing and visual analytics. *Genome Biol.* **16**, 283, <https://doi.org/10.1186/s13059-015-0836-5>
- 99 Molloy, J.C. (2011) The open knowledge foundation: open data means better science. *PLoS Biol.* **9**, e1001195, <https://doi.org/10.1371/journal.pbio.1001195>
- 100 Williams, E. et al. (2017) Image Data Resource: a bioimage data integration and publication platform. *Nat. Methods* **14**, 775, <https://www.nature.com/articles/nmeth.4326-supplementary-information>, <https://doi.org/10.1038/nmeth.4326>
- 101 Murphy, R.F. (2016) Building cell models and simulations from microscope images. *Methods* **96**, 33–39, <https://doi.org/10.1016/j.ymeth.2015.10.011>
- 102 Johnson, G.R., Li, J., Shariff, A., Rohde, G.K. and Murphy, R.F. (2015) Automated learning of subcellular variation among punctate protein patterns and a generative model of their relation to microtubules. *PLoS Comput. Biol.* **11**, e1004614, <https://doi.org/10.1371/journal.pcbi.1004614>
- 103 Belthangady, C. and Royer, L. (2018) Applications, promises, and pitfalls of deep learning for fluorescence image reconstruction. *Preprint*, <https://doi.org/10.20944/preprints201812.0137.v1>
- 104 Johnson, G.R., Donovan-Maiye, R.M. and Maleckar, M.M. (2017) Generative modeling with conditional autoencoders: building an integrated cell. *arXiv:1705.00092*
- 105 Osokin, A., Chessel, A., Carazo Salas, R.E. and Vaggi, F. (2017) GANs for biological image synthesis. *arXiv:1708.04692*
- 106 Goldsborough, P., Pawlowski, N., Caicedo, J.C., Singh, S. and Carpenter, A. (2017) CytoGAN: generative modeling of cell images. *bioRxiv* 227645, <https://doi.org/10.1101/227645>
- 107 Ouyang, W., Aristov, A., Lelek, M., Hao, X. and Zimmer, C. (2018) Deep learning massively accelerates super-resolution localization microscopy. *Nat. Biotechnol.* **36**, 460, <https://www.nature.com/articles/nbt.4106-supplementary-information>, <https://doi.org/10.1038/nbt.4106>
- 108 Wang, H. et al. (2019) Deep learning enables cross-modality super-resolution in fluorescence microscopy. *Nat. Methods* **16**, 103–110, <https://doi.org/10.1038/s41592-018-0239-0>
- 109 Calimeri, F., Marzullo, A., Stamile, C. and Terracina, G. (2017) Biomedical Data Augmentation Using Generative Adversarial Neural Networks. In *Artificial Neural Networks and Machine Learning – ICANN 2017* (Lintas, A., Rovetta, S., Verschure, P.F.M.J and Villa, A.E.P., eds), Springer International Publishing, <https://doi.org/10.1007/978-3-319-68612-7>
- 110 Kiyoi dos Santos Tanaka, F.H. and Aranha, C. (2019) Data augmentation using GANs. *arXiv*
- 111 Borel, B. (2018) Clicks, lies and videotape. *Sci. Am.* **319**, 38–43, <https://doi.org/10.1038/scientificamerican1018-38>
- 112 Keller, P.J., Schmidt, A.D., Wittbrodt, J. and Stelzer, E.H.K. (2008) Reconstruction of zebrafish early embryonic development by scanned light sheet microscopy. *Science* **322**, 1065–1069, <https://doi.org/10.1126/science.1162493>
- 113 McDole, K. et al. (2018) In Toto imaging and reconstruction of post-implantation mouse development at the single-cell level. *Cell* **175**, 859.e833–876.e833, <https://doi.org/10.1016/j.cell.2018.09.031>

- 114 Wait, E., Winter, M., Mankowski, W., Cohen, A.R. and Temple, S. (2016) LEVER: software tools for segmentation, tracking and lineaging of proliferating cells. *Bioinformatics* **32**, 3530–3531, <https://doi.org/10.1093/bioinformatics/btw406>
- 115 Snijder, B. and Pelkmans, L. (2011) Origins of regulated cell-to-cell variability. *Nat. Rev. Mol. Cell Biol.* **12**, 119, <https://www.nature.com/articles/nrm3044-supplementary-information>, <https://doi.org/10.1038/nrm3044>
- 116 Suzanne, M. and Steller, H. (2013) Shaping organisms with apoptosis. *Cell Death Differ.* **20**, 669, <https://doi.org/10.1038/cdd.2013.11>
- 117 Galluzzi, L. et al. (2018) Molecular mechanisms of cell death: recommendations of the Nomenclature Committee on Cell Death 2018. *Cell Death Differ.* **25**, 486–541
- 118 Schroeder, T. (2011) Long-term single-cell imaging of mammalian stem cells. *Nat. Methods* **8**, S30, <https://doi.org/10.1038/nmeth.1577>
- 119 Keller, P.J. (2013) Imaging morphogenesis: technological advances and biological insights. *Science* **340**, 1234168, <https://doi.org/10.1126/science.1234168>
- 120 Etzrodt, M., Endele, M. and Schroeder, T. (2014) Quantitative single-cell approaches to stem cell research. *Cell Stem Cell* **15**, 546–558, <https://doi.org/10.1016/j.stem.2014.10.015>
- 121 Feigelman, J. et al. (2016) Analysis of cell lineage trees by exact bayesian inference identifies negative autoregulation of Nanog in mouse embryonic stem cells. *Cell Syst.* **3**, 480e413–490.e413, <https://doi.org/10.1016/j.cels.2016.11.001>
- 122 Buggenthin, F. et al. (2017) Prospective identification of hematopoietic lineage choice by deep learning. *Nat. Methods* **14**, 403, <https://www.nature.com/articles/nmeth.4182-supplementary-information>, <https://doi.org/10.1038/nmeth.4182>
- 123 Orth, A., Schaak, D. and Schonbrun, E. (2017) Microscopy, meet big data. *Cell Syst.* **4**, 260–261, <https://doi.org/10.1016/j.cels.2017.03.009>
- 124 Hormoz, S. et al. (2016) Inferring cell-state transition dynamics from lineage trees and endpoint single-cell measurements. *Cell Syst.* **3**, 419e418–433.e418, <https://doi.org/10.1016/j.cels.2016.10.015>
- 125 Spanjaard, B. and Junker, J.P. (2017) Methods for lineage tracing on the organism-wide level. *Curr. Opin. Cell Biol.* **49**, 16–21, <https://doi.org/10.1016/j.ceb.2017.11.004>
- 126 Yuan, J., Sheng, J. and Sims, P.A. (2018) SCOPE-Seq: a scalable technology for linking live cell imaging and single-cell RNA sequencing. *Genome Biol.* **19**, 227, <https://doi.org/10.1186/s13059-018-1607-x>
